# Supplementary material for: Young Sprague Dawley rats infected by Plasmodium berghei: A relevant experimental model to study cerebral malaria
Source: PubMed Central journal article supplement (PMC5524346; doi:10.1371/journal.pone.0181300), 2017-07-24
Supplement: pone.0181300.s007.pdf [file pone.0181300.s007.pdf]

| Parameters                                          | Days | ECM                   | NoECM                 | CTRL                 | ECM - NoECM | ECM - CTRL | NoECM - CTRL |
|-----------------------------------------------------|------|-----------------------|-----------------------|----------------------|-------------|------------|--------------|
| White Blood Cell (WBC) count (x10 <sup>9</sup> */L) | D+1  | 30.8 ± 3.15<br>(n=7)  | 36.5 ± 5.93<br>(n=6)  | 19.1 ± 0.35<br>(n=3) | 0.975       | 0.366      | 0.302        |
|                                                     | D+2  | 48.4 ± 5.98<br>(n=11) | 46.9 ± 6.05<br>(n=8)  | 18.4 ± 1.23<br>(n=3) | 0.793       | 0.001      | 0.007        |
|                                                     | D+3  | NA                    | 81.3 ± 18.32<br>(n=5) | 14.4 ± NA<br>(n=1)   | NA          | NA         | <0.001       |
| % Lymphocytes in WBC (%)                            | D+1  | 72.1 ± 1.59<br>(n=7)  | 71.1 ± 2.47<br>(n=5)  | 82.0 ± 1.02<br>(n=3) | 0.968       | 0.526      | 0.661        |
|                                                     | D+2  | 66.3 ± 1.97<br>(n=11) | 74.3 ± 2.24<br>(n=8)  | 77.2 ± 1.11<br>(n=3) | 0.004       | 0.215      | 0.999        |
|                                                     | D+3  | NA                    | 78.6 ± 3.24<br>(n=5)  | 84.7 ± NA<br>(n=1)   | NA          | NA         | 0.998        |
| % Monocytes in WBC (%)                              | D+1  | 13.7 ± 1.34<br>(n=7)  | 14.6 ± 0.81<br>(n=5)  | 12.4 ± 0.72<br>(n=3) | 0.912       | 0.997      | 0.951        |
|                                                     | D+2  | 16.3 ± 0.66<br>(n=11) | 13.0 ± 0.84<br>(n=8)  | 14.7 ± 0.35<br>(n=3) | 0.003       | 0.905      | 0.461        |
|                                                     | D+3  | NA                    | 11.0 ± 1.24<br>(n=5)  | 10.1 ± NA<br>(n=1)   | NA          | NA         | 0.995        |
| % Granulocytes in WBC (%)                           | D+1  | 14.2 ± 1.15<br>(n=7)  | 14.3 ± 1.99<br>(n=5)  | 5.7 ± 0.48<br>(n=3)  | 0.920       | 0.366      | 0.536        |
|                                                     | D+2  | 17.3 ± 1.67<br>(n=11) | 12.7 ± 1.93<br>(n=8)  | 8.1 ± 1.23<br>(n=3)  | 0.073       | 0.140      | 0.710        |
|                                                     | D+3  | NA                    | 10.4 ± 2.32<br>(n=5)  | 5.2 ± NA<br>(n=1)    | NA          | NA         | 0.964        |
| Lymphocyte Count (x10 <sup>9</sup> */L)             | D+1  | 22.2 ± 2.48<br>(n=7)  | 27.7 ± 3.88<br>(n=5)  | 15.6 ± 0.38<br>(n=3) | 0.983       | 0.539      | 0.607        |
|                                                     | D+2  | 31.6 ± 4.03<br>(n=11) | 35.3 ± 5.36<br>(n=8)  | 14.1 ± 1.08<br>(n=3) | 0.922       | 0.081      | 0.055        |
|                                                     | D+3  | NA                    | 66.2 ± 16.79<br>(n=5) | 12.2 ± NA<br>(n=1)   | NA          | NA         | <0.001       |
| Monocyte Count (x10 <sup>9</sup> */L)               | D+1  | 3.9 ± 0.31<br>(n=7)   | 5.8 ± 1.11<br>(n=5)   | 2.3 ± 0.12<br>(n=3)  | 0.537       | 0.747      | 0.377        |
|                                                     | D+2  | 8.0 ± 1.01<br>(n=11)  | 5.7 ± 0.51<br>(n=8)   | 2.7 ± 0.12<br>(n=3)  | 0.051       | 0.017      | 0.265        |
|                                                     | D+3  | NA                    | 8.2 ± 1.44<br>(n=5)   | 1.4 ± NA<br>(n=1)    | NA          | NA         | 0.001        |
| Granulocyte Count (x10 <sup>9</sup> */L)            | D+1  | 4.6 ± 0.68<br>(n=7)   | 6.0 ± 1.58<br>(n=5)   | 1.2 ± 0.12<br>(n=3)  | 0.988       | 0.640      | 0.613        |
|                                                     | D+2  | 8.8 ± 1.39<br>(n=11)  | 5.8 ± 0.92<br>(n=8)   | 1.6 ± 0.20<br>(n=3)  | 0.035       | 0.029      | 0.411        |
|                                                     | D+3  | NA                    | 7.1 ± 0.53<br>(n=5)   | 0.8 ± NA<br>(n=1)    | NA          | NA         | 0.159        |

| Parameters                                          | Days | ECM                   | NoECM                | CTRL                 | ECM - NoECM | ECM - CTRL | NoECM - CTRL |
|-----------------------------------------------------|------|-----------------------|----------------------|----------------------|-------------|------------|--------------|
| Red Blood Cell Count<br>(x10 <sup>12</sup> */L)     | D+1  | 6.0 ± 0.18<br>(n=7)   | 5.6 ± 0.35<br>(n=6)  | 5.9 ± 0.13<br>(n=3)  | 0.977       | 0.895      | 0.961        |
|                                                     | D+2  | 6.4 ± 0.39<br>(n=11)  | 5.0 ± 0.36<br>(n=8)  | 6.3 ± 0.13<br>(n=3)  | 0.036       | 0.935      | 0.407        |
|                                                     | D+3  | NA                    | 5.0 ± 0.34<br>(n=6)  | 5.8 ± NA<br>(n=1)    | NA          | NA         | 0.845        |
| Hemoglobin (g/dL)                                   | D+1  | 11.1 ± 0.24<br>(n=7)  | 10.3 ± 0.63<br>(n=6) | 11.0 ± 0.15<br>(n=3) | 0.773       | 0.955      | 0.975        |
|                                                     | D+2  | 11.7 ± 0.72<br>(n=11) | 9.1 ± 0.65<br>(n=8)  | 11.1 ± 0.13<br>(n=3) | 0.005       | 0.744      | 0.386        |
|                                                     | D+3  | NA                    | 9.1 ± 0.67<br>(n=6)  | 11.0 ± NA<br>(n=1)   | NA          | NA         | 0.649        |
| Hematocrit (%)                                      | D+1  | 40.1 ± 0.95<br>(n=7)  | 36.5 ± 2.01<br>(n=6) | 37.5 ± 0.55<br>(n=3) | 0.713       | 0.863      | 0.998        |
|                                                     | D+2  | 42.0 ± 2.67<br>(n=11) | 32.9 ± 2.67<br>(n=8) | 40.5 ± 0.38<br>(n=3) | 0.026       | 0.923      | 0.385        |
|                                                     | D+3  | NA                    | 35.5 ± 3.08<br>(n=6) | 37.0 ± NA<br>(n=1)   | NA          | NA         | 0.976        |
| Mean corpuscular volume (fL)                        | D+1  | 66.4 ± 0.78<br>(n=7)  | 65.2 ± 0.75<br>(n=6) | 64.0 ± 0.58<br>(n=3) | 0.363       | 0.897      | 0.881        |
|                                                     | D+2  | 65.9 ± 0.71<br>(n=11) | 66.1 ± 1.24<br>(n=8) | 64.3 ± 0.88<br>(n=3) | 0.830       | 0.977      | 0.986        |
|                                                     | D+3  | NA                    | 70.8 ± 1.97<br>(n=6) | 64.0 ± NA<br>(n=1)   | NA          | NA         | 0.015        |
| Mean corpuscular hemoglobin<br>(pg)                 | D+1  | 18.4 ± 0.19<br>(n=7)  | 18.3 ± 0.11<br>(n=6) | 18.8 ± 0.18<br>(n=3) | 0.995       | 0.472      | 0.534        |
|                                                     | D+2  | 18.4 ± 0.20<br>(n=11) | 18.3 ± 0.10<br>(n=8) | 17.8 ± 0.22<br>(n=3) | 0.854       | 0.289      | 0.524        |
|                                                     | D+3  | NA                    | 18.3 ± 0.23<br>(n=6) | 18.9 ± NA<br>(n=1)   | NA          | NA         | 0.303        |
| Mean corpuscular hemoglobin<br>concentration (g/dL) | D+1  | 27.7 ± 0.10<br>(n=7)  | 28.1 ± 0.31<br>(n=6) | 29.4 ± 0.22<br>(n=3) | 0.310       | 0.251      | 0.859        |
|                                                     | D+2  | 28.0 ± 0.21<br>(n=11) | 27.8 ± 0.52<br>(n=8) | 27.5 ± 0.18<br>(n=3) | 0.604       | 0.669      | 0.328        |
|                                                     | D+3  | NA                    | 25.9 ± 0.61<br>(n=6) | 29.8 ± NA<br>(n=1)   | NA          | NA         | 0.001        |
| Red cell distribution width (%)                     | D+1  | 14.4 ± 0.15<br>(n=7)  | 14.2 ± 0.38<br>(n=6) | 14.6 ± 0.15<br>(n=3) | 0.944       | 0.490      | 0.641        |
|                                                     | D+2  | 14.5 ± 0.21<br>(n=11) | 13.9 ± 0.15<br>(n=8) | 14.8 ± 0.47<br>(n=3) | 0.367       | 0.412      | 0.096        |
|                                                     | D+3  | NA                    | 13.7 ± 0.42<br>(n=6) | 14.6 ± NA<br>(n=1)   | NA          | NA         | 0.231        |

| Parameters                            | Days | ECM                    | NoECM                  | CTRL                       | ECM - NoECM | ECM - CTRL | NoECM - CTRL |
|---------------------------------------|------|------------------------|------------------------|----------------------------|-------------|------------|--------------|
| Platelet Count (x10 <sup>9</sup> */L) | D+1  | 233.0 ± 41.59<br>(n=6) | 245.8 ± 70.25<br>(n=4) | 657.5 ± NA<br>(n=2)        | 0.765       | <0.001     | <0.001       |
|                                       | D+2  | 78.9 ± 14.96<br>(n=11) | 176.8 ± 87.42<br>(n=6) | 900.3 ±<br>110.11<br>(n=3) | 0.496       | <0.001     | <0.001       |
|                                       | D+3  | NA                     | 129.2 ± 32.04<br>(n=6) | NA                         | NA          | NA         | NA           |
| Mean platelet volume (fL)             | D+1  | 7.4 ± 0.20<br>(n=7)    | 7.6 ± 0.58<br>(n=6)    | 6.7 ± 0.47<br>(n=3)        | 0.677       | 0.267      | 0.672        |
|                                       | D+2  | 7.5 ± 0.26<br>(n=11)   | 7.7 ± 0.34<br>(n=8)    | 6.4 ± 0.24<br>(n=3)        | 0.668       | 0.122      | 0.427        |
|                                       | D+3  | NA                     | 8.7 ± 0.36<br>(n=6)    | 6.9 ± NA<br>(n=1)          | NA          | NA         | 0.507        |
| Platelet distribution width (%)       | D+1  | 10.5 ± 0.63<br>(n=7)   | 9.3 ± 1.81<br>(n=4)    | 10.9 ± 0.38<br>(n=3)       | 0.798       | 0.983      | 0.805        |
|                                       | D+2  | 4.2 ± 1.00<br>(n=11)   | 9.5 ± 1.40<br>(n=6)    | 11.4 ± 0.20<br>(n=3)       | 0.004       | 0.011      | 0.797        |
|                                       | D+3  | NA                     | 10.3 ± 2.01<br>(n=5)   | 5.1 ± NA<br>(n=1)          | NA          | NA         | 0.309        |
| Thrombocrit (%)                       | D+1  | 0.20 ± 0.037<br>(n=7)  | 0.17 ± 0.046<br>(n=4)  | 0.40 ± 0.060<br>(n=3)      | 0.879       | 0.019      | 0.015        |
|                                       | D+2  | 0.06 ± 0.012<br>(n=11) | 0.13 ± 0.059<br>(n=6)  | 0.58 ± 0.079<br>(n=3)      | 0.600       | <0.001     | <0.001       |
|                                       | D+3  | NA                     | 0.11 ± 0.022<br>(n=6)  | 0.05 ± NA<br>(n=1)         | NA          | NA         | 0.647        |
